# Supplementary material for: Structural and biochemical characterization of Plasmodium falciparum Hsp70‐x reveals functional versatility of its C‐terminal EEVN motif
Source: PubMed Central journal article supplement (PMC6282620; doi:10.1002/prot.25600), 2018-09-29
Supplement: PROT-86-1189-s001.pdf [file PROT-86-1189-s001.pdf]

## Supplementary Figure 1

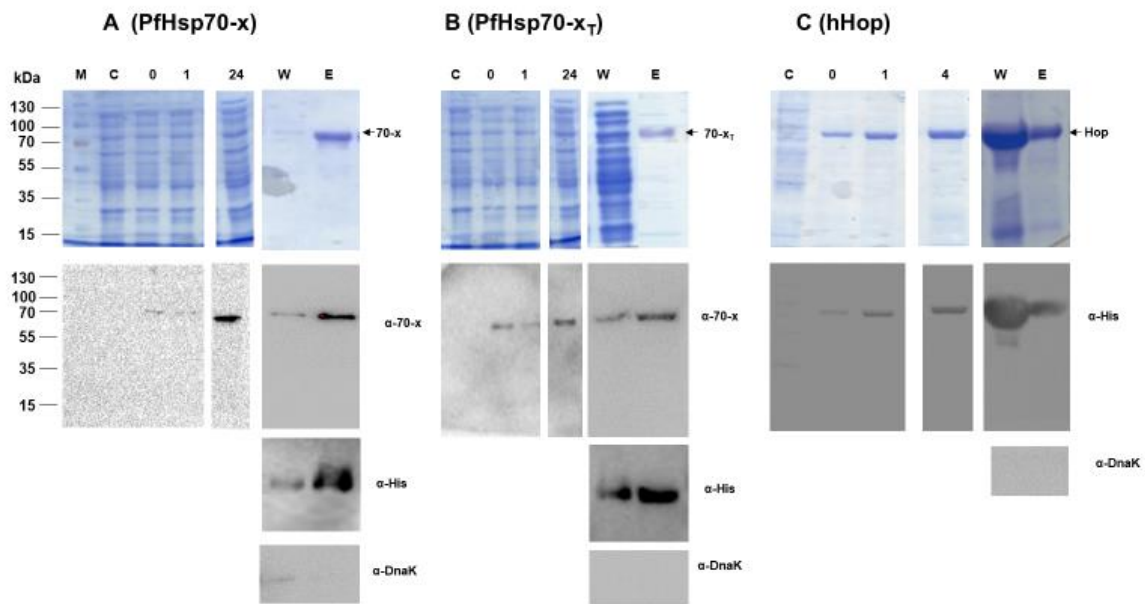

### Expression and purification of recombinant proteins

(A) PfHsp70-x, (B) PfHsp70-x<sub>T</sub> and (C) hHop were expressed in *E. coli* XL1 Blue cells transformed with pQE30/PfHsp70-x/PfHsp70-x<sub>T</sub> and pQE30/hHop. SDS-PAGE (12 %) and Western analyses (lower panel) for the expression of recombinant PfHsp70-x/PfHsp70-x<sub>T</sub>/hHop, the purification of the recombinant proteins was conducted as previously described (19; 20). Lane M – Page ruler (Thermo Scientific) in kDa is shown on the left hand side; lane C - the total extract for cells transformed with a neat pQE30 plasmid; lane 0 – total cell extract transformed prior to IPTG induction; lanes 1, 4, 24 – total cell lysate obtained 1, 4 hr and overnight post induction. Lane W; washes, and lane E—recombinant protein eluted using 500 mM imidazole. Lower panels: Western blot confirming expression, purification of PfHsp70-x/PfHsp70-x<sub>T</sub> and hHop. The Western blots were based on α-PfHsp70-x and α-His used as primary antibodies, respectively. Furthermore, to confirm the purity of PfHsp70-x/PfHsp70-x<sub>T</sub> and hHop from DnaK contamination, Western blotting was conducted using α-DnaK antibodies.

## Supplementary Figure 2

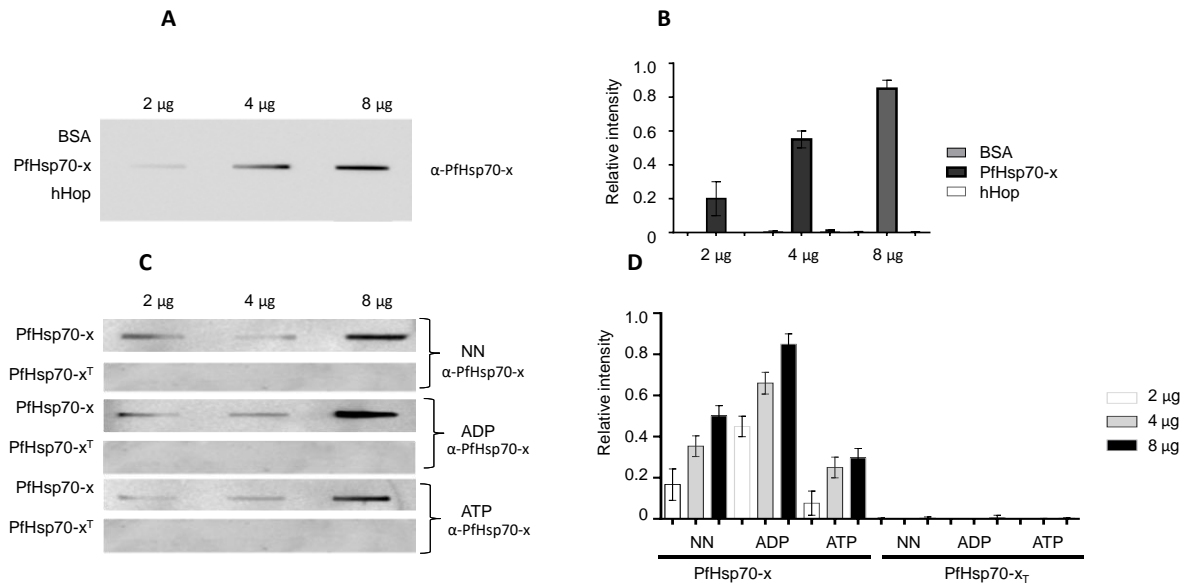

### PfHsp70-x directly interacts with human Hop

Slot blot analysis (A) and accompanying densitometric readings (B) confirming the specificity of  $\alpha$ -PfHsp70-x antibodies were first conducted; Subsequent to this, slot blot analyses (C) and accompanying densitometric readings (D) to demonstrate interaction of PfHsp70-x/PfHsp70-x<sub>T</sub> and human Hop were conducted. The assays were conducted either in the absence of nucleotide (NN); or presence of 5 mM ADP/ATP, respectively. The data was obtained from at least three independent assays conducted using different protein batches. Error bars are indicated. The association between PfHsp70-x and hHop was demonstrated to be dose dependent and was further ascertained by densitometric analysis; ANOVA ( $p < 0.001$ ).
