# Supplementary material for: Structural and biochemical characterization of Plasmodium falciparum Hsp70‐x reveals functional versatility of its C‐terminal EEVN motif
Source: PubMed Central journal article supplement (PMC6282620; doi:10.1002/prot.25600), 2018-09-29
Supplement: PROT-86-1189-s002.pdf [file PROT-86-1189-s002.pdf]

**Supplementary Table 1. Binding affinities of PfHsp70-x/PfHsp70-xT for peptide substrates**

| Ligand     | Analyte             | $k_a$ (1/ Ms)                     | $k_a$ (1/s)                        | $K_D$ (M)                          | $\chi^2$ |
|------------|---------------------|-----------------------------------|------------------------------------|------------------------------------|----------|
| PfHsp70-x  | -                   | NS                                | NS                                 | NS                                 | ND       |
|            | NRLLTG              | 3.86 ( $\pm$ 0.20)                | 9.97 ( $\pm$ 0.41) e <sup>-6</sup> | 2.50 ( $\pm$ 0.34) e <sup>-7</sup> | 0.98     |
|            | NRLLTG + ADP        | 1.62 ( $\pm$ 0. 22)               | 1.01 ( $\pm$ 0.28) e <sup>-5</sup> | 6.20 ( $\pm$ 0.12) e <sup>-7</sup> | 4.38     |
|            | NRLLTG + ATP        | 1.21 ( $\pm$ 0.23)                | 1.01 ( $\pm$ 0.13) e <sup>-5</sup> | 1.70 ( $\pm$ 0.30) e <sup>-6</sup> | 2.10     |
| PfHsp70-xT | -                   | NS                                | NS                                 | NS                                 | ND       |
|            | NRLLTG              | 3.15 ( $\pm$ 0.31)                | 8.67 ( $\pm$ 0.42) e <sup>-6</sup> | 2.80 ( $\pm$ 0.14) e <sup>-7</sup> | 0.24     |
|            | NRLLTG + ADP        | 6.0 ( $\pm$ 0.51)                 | 1.00 ( $\pm$ 0.21) e <sup>-5</sup> | 1.70 ( $\pm$ 0.34) e <sup>-7</sup> | 3.21     |
|            | NRLLTG + ATP        | 3.18 ( $\pm$ 0.42) e <sup>1</sup> | 1.61( $\pm$ 0.36) e <sup>-4</sup>  | 1.80 ( $\pm$ 0.23) e <sup>-6</sup> | 2.37     |
| PfHsp70-x  | NRNNTG              | 2.43 ( $\pm$ 0.45)                | 9.49 ( $\pm$ 0.27) e <sup>-7</sup> | 6.91 ( $\pm$ 0.43) e <sup>-9</sup> | 1.31     |
|            | NRNNTG +ADP         | 2.55 ( $\pm$ 0.23)                | 1.03 ( $\pm$ 0.41) e <sup>-7</sup> | 4.31 ( $\pm$ 0.30) e <sup>-9</sup> | 3.98     |
|            | NRNNTG +ATP         | 7.33 ( $\pm$ 0.22)                | 1.01 ( $\pm$ 0.31) e <sup>-6</sup> | 1.37 ( $\pm$ 0.20) e <sup>-7</sup> | 4.10     |
| PfHsp70-xT | NRNNTG              | 3.52 ( $\pm$ 0.18)                | 2.79 ( $\pm$ 0.19) e <sup>-8</sup> | 7.92 ( $\pm$ 0.50) e <sup>-9</sup> | 1.56     |
|            | NRNNTG +ADP         | 5.96 ( $\pm$ 0.1)                 | 1.01 ( $\pm$ 0.31) e <sup>-8</sup> | 1.69 ( $\pm$ 0.30) e <sup>-9</sup> | 2.10     |
|            | NRNNTG +ATP         | 9.37 ( $\pm$ 0.17)                | 1.01 ( $\pm$ 0.21) e <sup>-5</sup> | 1.07 ( $\pm$ 0.20) e <sup>-7</sup> | 3.91     |
| PfHsp70-x  | GFTVVLMYRF          | 4.03 ( $\pm$ 0.19) e <sup>2</sup> | 1.03 ( $\pm$ 0.40) e <sup>-5</sup> | 1.09 ( $\pm$ 0.10) e <sup>-7</sup> | 0.812    |
|            | GFTVVLMYRF +<br>ADP | 3.53 ( $\pm$ 0.18) e <sup>2</sup> | 1.00 ( $\pm$ 0.14) e <sup>-5</sup> | 2.85 ( $\pm$ 0.20) e <sup>-7</sup> | 2.18     |
|            | GFTVVLMYRF + ATP    | 1.11 ( $\pm$ 0.20) e <sup>2</sup> | 1.17 ( $\pm$ 0.44) e <sup>-4</sup> | 1.90 ( $\pm$ 0.12) e <sup>-6</sup> | 4.12     |

|                        |                         |                              |                               |                               |      |
|------------------------|-------------------------|------------------------------|-------------------------------|-------------------------------|------|
| PfHsp70-x <sub>T</sub> | GFTVVLMYRF              | 2.48 (± 0.40) e <sup>1</sup> | 2.52 (± 0.34) e <sup>-6</sup> | 2.99 (± 0.10) e <sup>-7</sup> | 0.68 |
|                        | GFTVVLMYRF +<br>ADP     | 1.14 (± 0.19) e <sup>2</sup> | 1.01 (± 0.22) e <sup>-5</sup> | 1.76 (±0.11) e <sup>-7</sup>  | 2.36 |
|                        | GFTVVLMYRF + ATP        | 1.02 (± 0.16) e <sup>2</sup> | 1.01 (± 0.23) e <sup>-4</sup> | 1.10 (± 0.20) e <sup>-6</sup> | 5.91 |
| PfHsp70-x              | GFTNNNMYRF              | 9.03 (± 0.34) e <sup>2</sup> | 1.28 (± 0.2) e <sup>-7</sup>  | 2.40 (± 0.15) e <sup>-9</sup> | 0.89 |
|                        | GFTNNNMYRF +<br>ADP     | 4.60 (± 0.15) e <sup>2</sup> | 1.01(± 0.23) e <sup>-7</sup>  | 6.25 (± 0.80) e <sup>-9</sup> | 4.21 |
|                        | GFTNNNMYRF +<br>ATP     | 2.54 (± 0.13) e <sup>2</sup> | 1.01 (± 0.11) e <sup>-5</sup> | 3.97 (±0.15) e <sup>-7</sup>  | 2.58 |
| PfHsp70-x <sub>T</sub> | Peptide 2<br>GFTNNNMYRF | 3.60 (± 0.34) e <sup>2</sup> | 1.01(± 0.14) e <sup>-7</sup>  | 2.20 (±0.12) e <sup>-9</sup>  | 1.37 |
|                        | GFTNNNMYRF +<br>ADP     | 5.32 (± 0.45) e <sup>2</sup> | 1.01 (± 0.40) e <sup>-7</sup> | 1.40 (± 0.15) e <sup>-9</sup> | 3.10 |
|                        | GFTNNNMYRF +<br>ATP     | 8.57 (± 0.14) e <sup>2</sup> | 1.00 (± 0.20) e <sup>-5</sup> | 5.17 (± 0.16) e <sup>-7</sup> | 1.87 |
| PfHsp70-x              | ALLMYRR                 | 8.67 (±0.21) e <sup>-1</sup> | 1.28 (±0.92) e <sup>-6</sup>  | 1.47 (±0.30) e <sup>-6</sup>  | 3.03 |
|                        | ALLMYRR +ATP            | 2.65 (±0.11) e <sup>-2</sup> | 1.60 (±0.29) e <sup>-6</sup>  | 6.06 (±0.41) e <sup>-5</sup>  | 2.57 |
|                        | ALLMYRR +ADP            | 1.04 (± 0.21) e <sup>3</sup> | 2.82 (±0.33) e <sup>-3</sup>  | 2.82(±0.16) e <sup>-6</sup>   | 1.50 |
| PfHsp70-x <sub>T</sub> | ALLMYRR                 | 1.92 (±0.31) e <sup>-2</sup> | 1.04 (±0.45) e <sup>-5</sup>  | 5.42 (0.33) e <sup>-4</sup>   | 1.95 |
|                        | ALLMYRR +ATP            | ND                           | ND                            | ND                            | ND   |
|                        | ALLMYRR +ADP            | 3.32 (±0.21) e <sup>-2</sup> | 1.04 (±0.25) e <sup>-5</sup>  | 3.13(±0.42) e <sup>-4</sup>   | 1.89 |
| PfHsp70-x              | ANNMYRR                 | 3.31 (±0.31) e <sup>5</sup>  | 7.32 (±0.43) e <sup>-4</sup>  | 2.21 (±0.53) e <sup>-9</sup>  | 4.59 |
|                        | ANNMYRR +ATP            | 7.24 (±0.34) e <sup>3</sup>  | 5.67 (±0.11) e <sup>-3</sup>  | 7.83 (±0.33) e <sup>-7</sup>  | 3.78 |

|                        |                      |                          |                          |                          |      |
|------------------------|----------------------|--------------------------|--------------------------|--------------------------|------|
|                        | <b>ANNNMYRR +ADP</b> | $1.74 (\pm 0.13) e^6$    | $3.86 (\pm 0.24) e^{-3}$ | $2.21 (\pm 0.31) e^{-9}$ | 1.12 |
| PfHsp70-x <sub>T</sub> | <b>ANNNMYRR</b>      | $1.67 (\pm 0.34) e^{-2}$ | $1.04 (\pm 0.51) e^{-5}$ | $6.26 (\pm 0.32) e^{-4}$ | 3.24 |
|                        | <b>ANNNMYRR +ATP</b> | ND                       | ND                       | ND                       | ND   |
|                        | <b>ANNNMYRR +ADP</b> | $2.35 (\pm 0.37) e^{-2}$ | $1.04 (\pm 0.21) e^{-5}$ | $4.43 (\pm 0.43) e^{-4}$ | 2.66 |

ND, affinity too low to be determined; NS, No signal was detected; As a control a channel without immobilized protein was used as a background control for referencing; in bold are N residue insertions introduced in each peptide. The association rate constant is represented by (*ka*), dissociation rate constants (*kd*), and the equilibrium constant (denotes the affinity) is represented by (*K<sub>D</sub>*). Standard deviations about the respective means are shown.
